# Supplementary material
Source: PubMed Central journal article supplement (PMC9896586)
Supplement: NIHMS1857416-supplement-Supplementary_file_1.pdf [file NIHMS1857416-supplement-Supplementary_file_1.pdf]

Training data  
#1317 features

Test data  
# 1317 features

| Filter and select important features                |                       |                           |                               |
|-----------------------------------------------------|-----------------------|---------------------------|-------------------------------|
| Model                                               | Control, pooled IR    | Control, TBI, and Partial | Control, Brain, Gut, and Lung |
| Test (# features)                                   | Student's T test (17) | Anova (22)                | Anova + GBM (31)              |
| Elastic net (10 iterations and selected by overlap) | (7)                   | (8)                       | (7)                           |

LDA

RPART

Predict validation

Predict validation

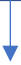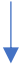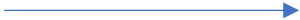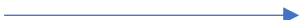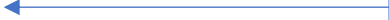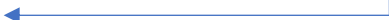

A)

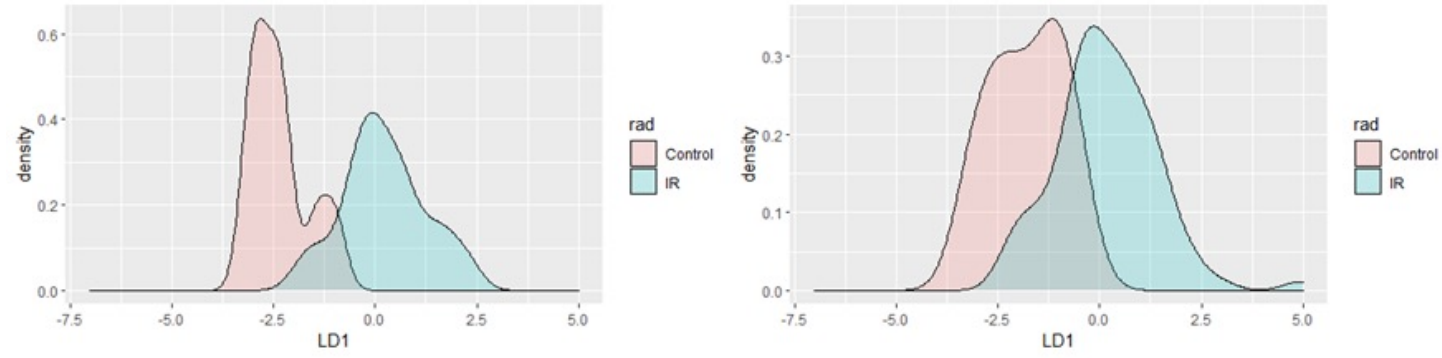

B)

| LDA Model 1 Prediction Matrix |         |    |               |         |    |
|-------------------------------|---------|----|---------------|---------|----|
| Training Data Set             |         |    | Test Data Set |         |    |
|                               | Control | IR |               | Control | IR |
| Control                       | 7       | 0  | Control       | 5       | 5  |
| IR                            | 2       | 94 | IR            | 5       | 85 |
| Accuracy                      | 0.98    |    | Accuracy      | 0.9     |    |

A)

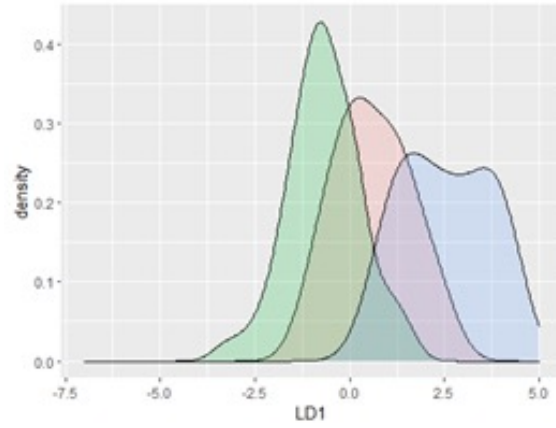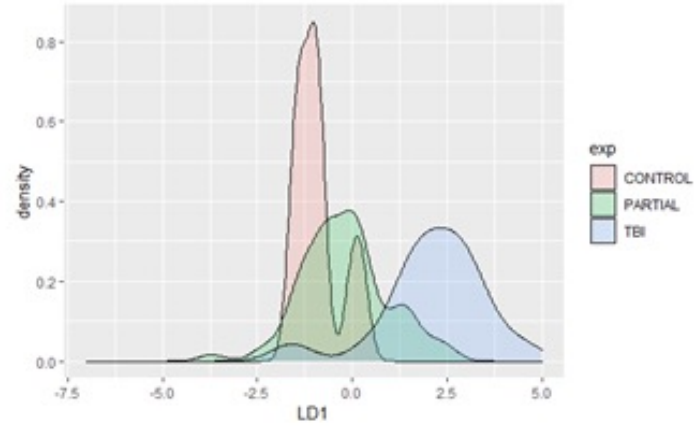

B)

| LDA Model 2 Prediction Matrix |         |         |     |               |         |     |
|-------------------------------|---------|---------|-----|---------------|---------|-----|
| Training Data Set             |         |         |     | Test Data Set |         |     |
|                               | Control | Partial | TBI | Control       | Partial | TBI |
| Control                       | 4       | 0       | 1   | 0             | 4       | 0   |
| Partial                       | 5       | 75      | 5   | 10            | 63      | 3   |
| TBI                           | 0       | 1       | 12  | 0             | 5       | 15  |
| Accuracy                      | 0.88    |         |     | Accuracy      | 0.78    |     |

A)

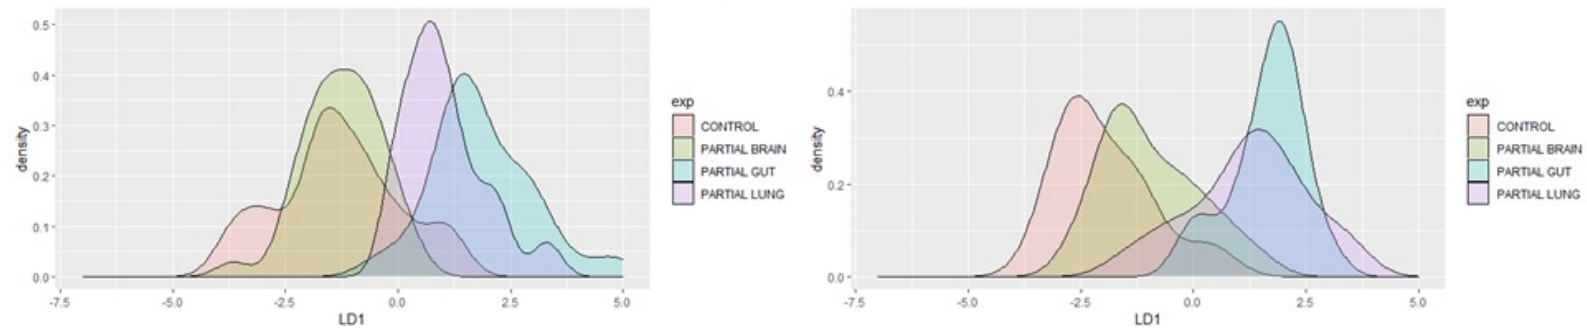

B)

| LDA Model 3 Prediction Matrix |         |       |     |      |               |         |       |     |      |
|-------------------------------|---------|-------|-----|------|---------------|---------|-------|-----|------|
| Training Data Set             |         |       |     |      | Test Data Set |         |       |     |      |
|                               | Control | Brain | Gut | Lung |               | Control | Brain | Gut | Lung |
| Control                       | 6       | 1     | 0   | 0    | Control       | 5       | 3     | 0   | 1    |
| Brain                         | 2       | 35    | 1   | 1    | Brain         | 5       | 25    | 2   | 2    |
| Gut                           | 0       | 0     | 17  | 3    | Gut           | 0       | 3     | 15  | 8    |
| Lung                          | 1       | 1     | 3   | 14   | Lung          | 0       | 2     | 4   | 7    |
| Accuracy                      | 0.85    |       |     |      | Accuracy      | 0.63    |       |     |      |
